# Supplementary material for: Patient-Level Omics Data Analysis Identifies Gene-Specific Survival Associations for a PD-1/PD-L1 Network in Pleural Mesothelioma
Source: MDPI journal article supplement (doi:10.3390/biomedinformatics2040037), 2022-11-11
Supplement: s1 [file s1]

Archive with 1 entries (1 files):
- biomedinformatics-1902901-supplementary.pdf
