# Supplementary material for: Patient-Level Omics Data Analysis Identifies Gene-Specific Survival Associations for a PD-1/PD-L1 Network in Pleural Mesothelioma
Source: MDPI journal article supplement (doi:10.3390/biomedinformatics2040037), 2022-11-11
Supplement: s1 [file s1 › biomedinformatics-1902901-supplementary.pdf]

Supplementary Table S1: Kaplan-Meier curve p-values obtained from cBioPortal and Benjamini-Hochberg adjusted p-values.

| Gene     | Survival LogRank Test P-Value | BH-Adjusted P-Values |
|----------|-------------------------------|----------------------|
| ACAP1    | 0.342                         | 0.845478             |
| ARHGAP9  | 0.546                         | 0.894727             |
| CCR5     | 0.0471                        | 0.41244              |
| CD274    | 0.349                         | 0.845478             |
| CD80     | 0.803                         | 0.9471               |
| CD96     | 0.194                         | 0.771273             |
| COX19    | 0.114                         | 0.771273             |
| CST7     | 0.828                         | 0.9471               |
| CXCR6    | 0.0136                        | 0.41244              |
| DNASE1   | 0.694                         | 0.894727             |
| DUS1L    | 0.674                         | 0.894727             |
| GATD3A   | 0.0354                        | 0.41244              |
| GBP1     | 0.902                         | 0.9471               |
| GBP5     | 0.608                         | 0.894727             |
| GIMAP5   | 0.462                         | 0.845478             |
| GPR171   | 0.407                         | 0.845478             |
| GZMA     | 0.0326                        | 0.41244              |
| GZMH     | 0.855                         | 0.9471               |
| GZMK     | 0.789                         | 0.9471               |
| GZMM     | 0.26                          | 0.845478             |
| HCST     | 0.202                         | 0.771273             |
| IKZF1    | 0.463                         | 0.845478             |
| IL21R    | 0.596                         | 0.894727             |
| JAK2     | 0.18                          | 0.771273             |
| JAKMIP1  | 0.987                         | 0.987                |
| LCP2     | 0.439                         | 0.845478             |
| LTA      | 0.16                          | 0.771273             |
| MAP4K1   | 0.567                         | 0.894727             |
| NKG7     | 0.424                         | 0.845478             |
| P2RY10   | 0.432                         | 0.845478             |
| PDCD1    | 0.617                         | 0.894727             |
| PDCD1LG2 | 0.432                         | 0.845478             |
| PSTPIP1  | 0.87                          | 0.9471               |
| PTPRCAP  | 0.393                         | 0.845478             |
| PYHIN1   | 0.644                         | 0.894727             |
| RASAL3   | 0.925                         | 0.947561             |
| SAMD9L   | 0.159                         | 0.771273             |
| SEPTIN1  | 0.67                          | 0.894727             |
| SH2D1A   | 0.901                         | 0.9471               |

|          |        |          |
|----------|--------|----------|
| TBC1D10C | 0.0491 | 0.41244  |
| TRAF3IP3 | 0.307  | 0.845478 |
| ZNF831   | 0.703  | 0.894727 |

Supplementary Table S2: Node degree distribution for the PDCD1/CD274 network as identified by STRING analysis.

| #node    | node_degree |
|----------|-------------|
| ACAP1    | 2           |
| ARHGAP9  | 5           |
| C21orf33 | 0           |
| CCR5     | 12          |
| CD274    | 9           |
| CD80     | 10          |
| CD96     | 2           |
| COX19    | 0           |
| CST7     | 9           |
| CXCR6    | 5           |
| DNASE1   | 0           |
| DUS1L    | 0           |
| GBP1     | 3           |
| GBP5     | 5           |
| GIMAP5   | 4           |
| GPR171   | 0           |
| GZMA     | 14          |
| GZMH     | 8           |
| GZMK     | 8           |
| GZMM     | 1           |
| HCST     | 5           |
| IKZF1    | 9           |
| IL21R    | 7           |
| JAK2     | 9           |
| JAKMIP1  | 0           |
| LCP2     | 12          |
| LTA      | 4           |
| MAP4K1   | 3           |
| NKG7     | 9           |
| P2RY10   | 3           |
| PDCD1    | 10          |
| PDCD1LG2 | 5           |
| PSTPIP1  | 3           |
| PTPRCAP  | 3           |
| PYHIN1   | 0           |

|          |   |
|----------|---|
| RASAL3   | 4 |
| SAMD9L   | 2 |
| SEPTIN1  | 0 |
| SH2D1A   | 2 |
| TBC1D10C | 7 |
| TRAF3IP3 | 8 |
| ZNF831   | 0 |

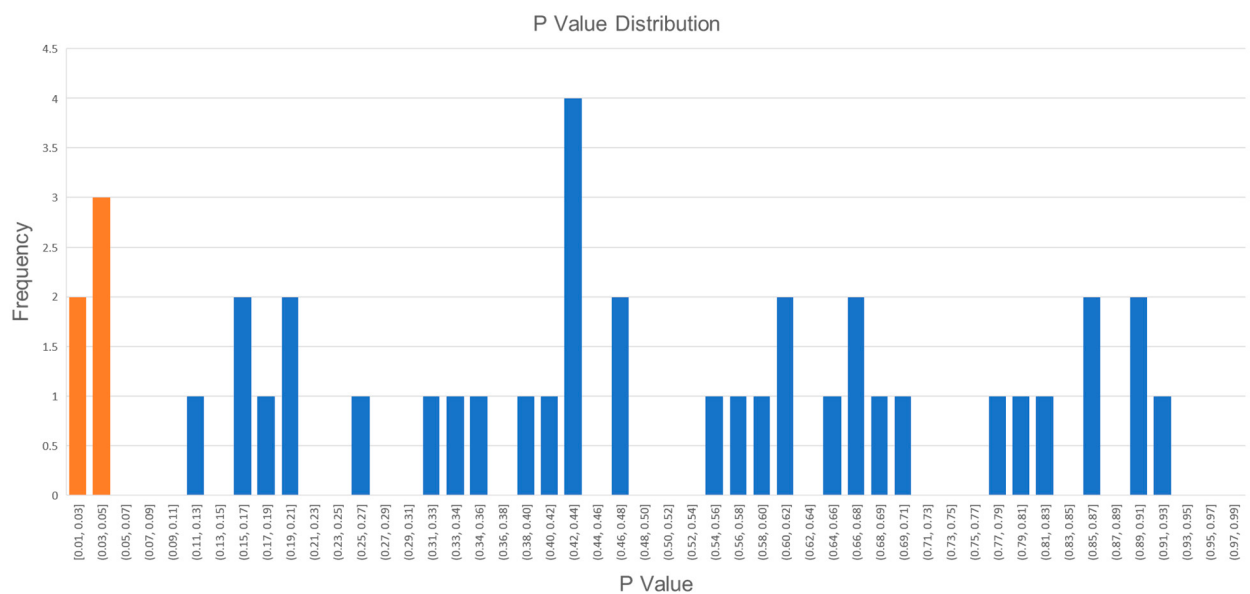

Supplementary Figure S1: Distribution of p-values from Kaplan–Meier plots for CD274, PDCD1, and 40 PDCD1/CD274-related genes. Data were generated using the mRNA expression z-scores relative to diploid samples (RNA Seq V2 RSEM) for the Mesothelioma (TCGA, PanCancer Atlas) study available on cBioPortal.

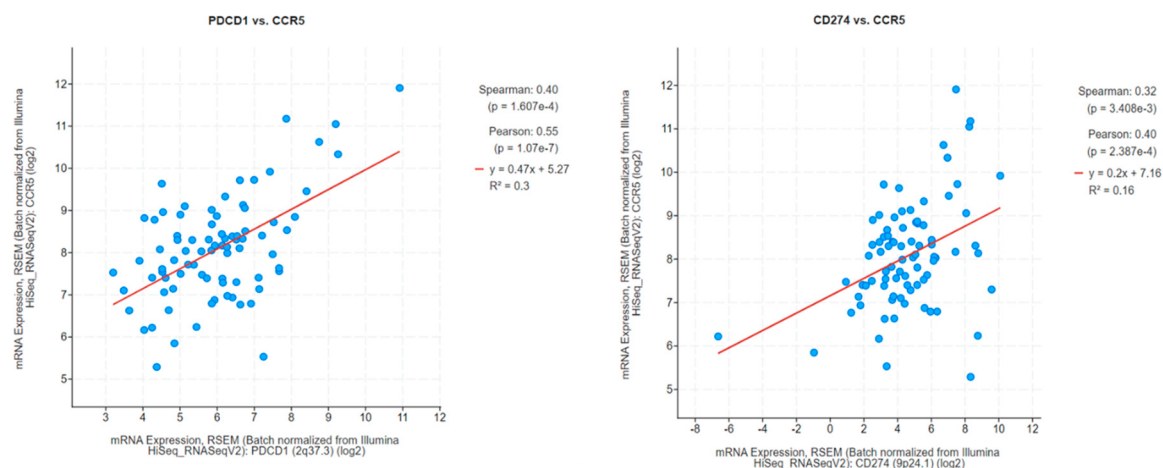

Supplementary Figure S2: Co-expression analysis of PDCD1 and CD274 with CCR5. Data was generated on cBioPortal using the “Mesothelioma (TCGA, PanCancer Atlas)” study on the cBioPortal homepage. This study was selected and “Query by Gene” was chosen. “mRNA expression z-scores relative to diploid samples (RNA Seq V2 RSEM)” was selected as the ‘type’ of mRNA expression and the default Patient/Case set was used. PDCD1 and CD274 were then inputted separately in turn and the Co-Expression tab under the “mRNA Expression, RSEM (Batch normalized from Illumina HiSeq\_RNASeqV2) (82 Samples)” setting was used.

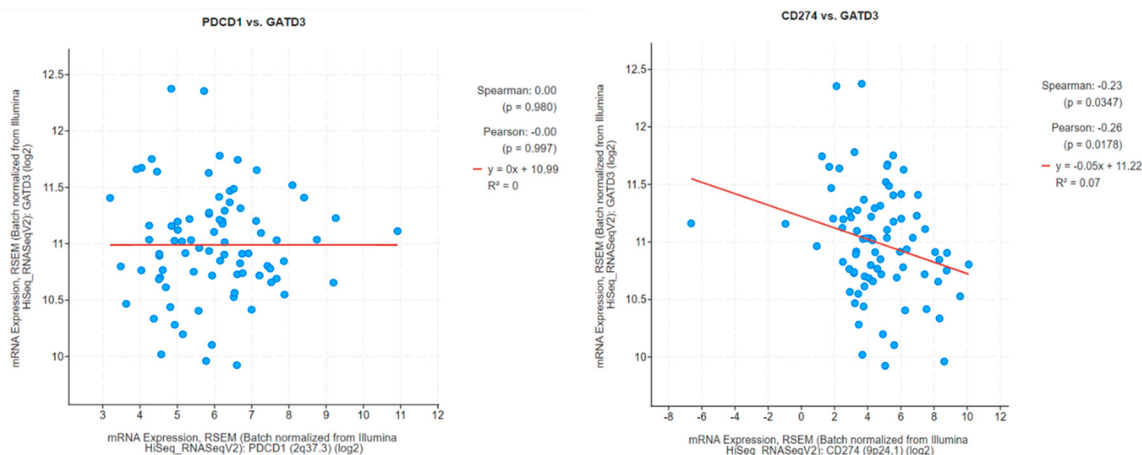

Supplementary Figure S3: Co-expression analysis of PDCD1 and CD274 with GATD3. Data was generated on cBioPortal using the “Mesothelioma (TCGA, PanCancer Atlas)” study on the cBioPortal homepage. This study was selected and “Query by Gene” was chosen. “mRNA expression z-scores relative to diploid samples (RNA Seq V2 RSEM)” was selected as the ‘type’ of mRNA expression and the default Patient/Case set was used. PDCD1 and CD274 were then inputted separately in turn and the Co-Expression tab under the “mRNA Expression, RSEM (Batch normalized from Illumina HiSeq\_RNASeqV2) (82 Samples)” setting was used.

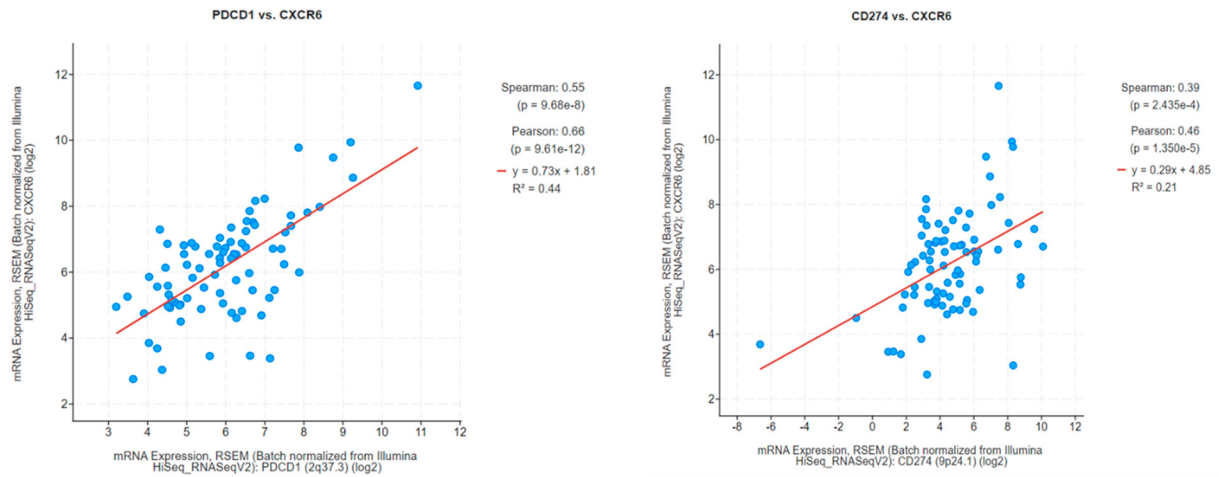

Supplementary Figure S4: Co-expression analysis of PDCD1 and CD274 with CXCR6. Data was generated on cBioPortal using the “Mesothelioma (TCGA, PanCancer Atlas)” study on the cBioPortal homepage. This study was selected and “Query by Gene” was chosen. “mRNA expression z-scores relative to diploid samples (RNA Seq V2 RSEM)” was selected as the ‘type’ of mRNA expression and the default Patient/Case set was used. PDCD1 and CD274 were then inputted separately in turn and the Co-Expression tab under the “mRNA Expression, RSEM (Batch normalized from Illumina HiSeq\_RNASeqV2) (82 Samples)” setting was used.

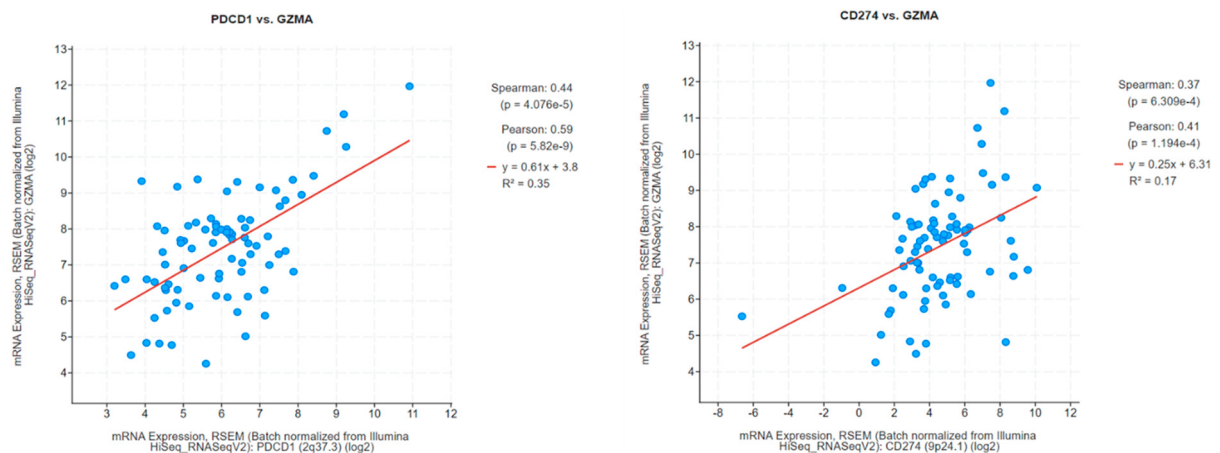

Supplementary Figure S5: Co-expression analysis of PDCD1 and CD274 with GZMA. Data was generated on cBioPortal using the “Mesothelioma (TCGA, PanCancer Atlas)” study on the cBioPortal

homepage. This study was selected and “Query by Gene” was chosen. “mRNA expression z-scores relative to diploid samples (RNA Seq V2 RSEM)” was selected as the ‘type’ of mRNA expression and the default Patient/Case set was used. PDCD1 and CD274 were then inputted separately in turn and the Co-Expression tab under the “mRNA Expression, RSEM (Batch normalized from Illumina HiSeq\_RNASeqV2) (82 Samples)” setting was used.

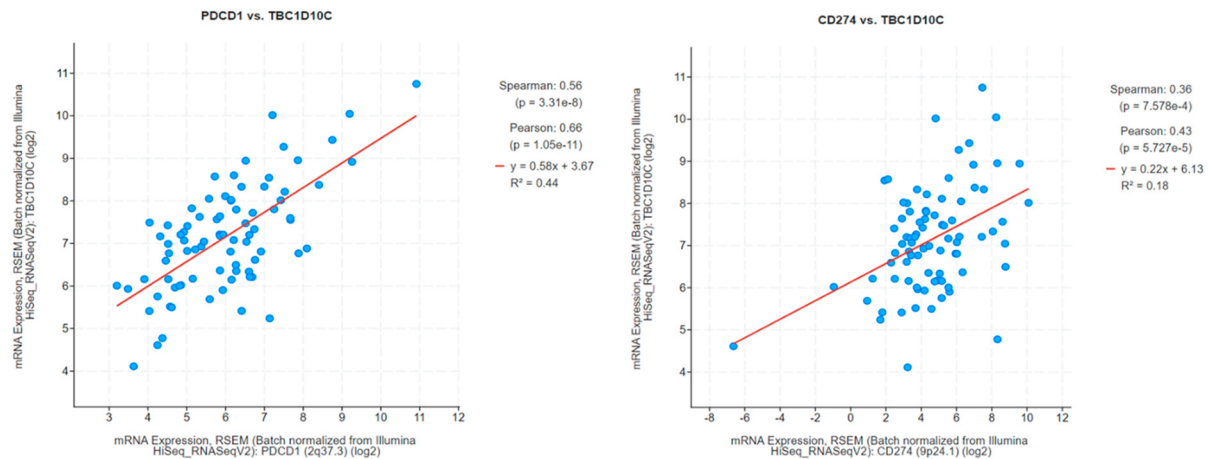

Supplementary Figure S6: Co-expression analysis of PDCD1 and CD274 with TBC1D10C. Data was generated on cBioPortal using the “Mesothelioma (TCGA, PanCancer Atlas)” study on the cBioPortal homepage. This study was selected and “Query by Gene” was chosen. “mRNA expression z-scores relative to diploid samples (RNA Seq V2 RSEM)” was selected as the ‘type’ of mRNA expression and the default Patient/Case set was used. PDCD1 and CD274 were then inputted separately in turn and the Co-Expression tab under the “mRNA Expression, RSEM (Batch normalized from Illumina HiSeq\_RNASeqV2) (82 Samples)” setting was used.
